# Supplementary material for: TRIM44 promotes quiescent multiple myeloma cell occupancy and survival in the osteoblastic niche via HIF-1α stabilization
Source: PubMed Central journal article supplement (PMC6365383; doi:10.1038/s41375-018-0222-x), 2018-08-08
Supplement: 41375_2018_222_MOESM2_ESM.pdf [file 41375_2018_222_MOESM2_ESM.pdf]

**Table S1 for Figure 1A**

| Type of MM | # of MM cells injected | # of CD34+ HSCs injected | Time | # of mouse | Tissue examined |
|------------|------------------------|--------------------------|------|------------|-----------------|
| -          | -                      | $10^6$                   | 60 h | 12         | BM              |
| NCI        | $5 \times 10^5$        | $10^6$                   | 60 h | 6          | BM              |
|            | $10^6$                 | $10^6$                   | 60 h | 6          | BM              |
| U266       | $5 \times 10^5$        | $10^6$                   | 60 h | 12         | BM              |
|            | $10^6$                 | $10^6$                   | 60 h | 12         | BM              |
| RPMI       | $5 \times 10^5$        | $10^6$                   | 60 h | 12         | BM              |
|            | $10^6$                 | $10^6$                   | 60 h | 12         | BM              |

**Table S2 for Figures 1B & C**

| Type of MM | # of MM cells injected | # of CD34+ HSCs injected | Time | # of mouse | Tissue examined |
|------------|------------------------|--------------------------|------|------------|-----------------|
| -          | -                      | $10^6$                   | 16 w | 6          | Blood/BM        |
| RPMI       | $5 \times 10^5$        | $10^6$                   | 16 w | 6          | Blood/BM        |
|            | $10^6$                 | $10^6$                   | 16 w | 6          | Blood/BM        |
|            | $3 \times 10^6$        | $10^6$                   | 16 w | 6          | Blood/BM        |

**Table S3 for Figure 1D**

| Type of MM | # of MM cells injected | # of CD34+ HSCs injected | Time | # of mouse | Tissue examined |
|------------|------------------------|--------------------------|------|------------|-----------------|
| -          | -                      | $10^6$                   | 60 h | 12         | OS/VS           |
| NCI        | $5 \times 10^5$        | $10^6$                   | 60 h | 6          | OS/VS           |
|            | $10^6$                 | $10^6$                   | 60 h | 6          | OS/VS           |
| U266       | $5 \times 10^5$        | $10^6$                   | 60 h | 9          | OS/VS           |
|            | $10^6$                 | $10^6$                   | 60 h | 9          | OS/VS           |
| RPMI       | $5 \times 10^5$        | $10^6$                   | 60 h | 12         | OS/VS           |
|            | $10^6$                 | $10^6$                   | 60 h | 12         | OS/VS           |

**Table S4 for Figure 1E**

| Type of MM | # of MM cells injected | # of CD34+ HSCs injected | Time | # of mouse | Tissue examined |
|------------|------------------------|--------------------------|------|------------|-----------------|
| -          | -                      | $10^6$                   | 16 w | 6          | OS/VS           |
| RPMI       | $5 \times 10^5$        | $10^6$                   | 16 w | 6          | OS/VS           |
|            | $10^6$                 | $10^6$                   | 16 w | 6          | OS/VS           |
|            | $3 \times 10^6$        | $10^6$                   | 16 w | 6          | OS/VS           |

**Table S5 for Figure 2B**

| Type of MM | # of MM cells injected | Mouse pretreated | Time | # of mouse | Tissue examined |
|------------|------------------------|------------------|------|------------|-----------------|
| RPMI8226   | 10 <sup>6</sup>        | Vehicle          | 60 h | 3          | OS / VS         |
| RPMI8226   | 10 <sup>6</sup>        | AMD3100          | 60 h | 3          | OS / VS         |

**Table S6 for Figure 2C**

| Type of MM | # of MM cells injected | Mouse pretreated | Time | # of mouse | Tissue examined |
|------------|------------------------|------------------|------|------------|-----------------|
| RPMI8226   | 10 <sup>6</sup>        | Vehicle          | 60 h | 3          | OS / VS         |
| RPMI8226   | 10 <sup>6</sup>        | PTH              | 60 h | 3          | OS / VS         |
| U266       | 10 <sup>6</sup>        | Vehicle          | 60 h | 3          | OS / VS         |
| U266       | 10 <sup>6</sup>        | PTH              | 60 h | 3          | OS / VS         |

**Table S7 for Figure 3A**

| Type of MM                           | # of MM cells injected | Time | # of mouse | Tissue examined |
|--------------------------------------|------------------------|------|------------|-----------------|
| RPMI8226<br>TRIM44 <sup>OE-CON</sup> | 10 <sup>6</sup>        | 60 h | 3          | OS / VS         |
| RPMI8226<br>TRIM44 <sup>OE</sup>     | 10 <sup>6</sup>        | 60 h | 3          | OS / VS         |
| U266<br>TRIM44 <sup>OE-CON</sup>     | 10 <sup>6</sup>        | 60 h | 3          | OS / VS         |
| U266<br>TRIM44 <sup>OE</sup>         | 10 <sup>6</sup>        | 60 h | 3          | OS / VS         |

**Table S8 for Figure 3B**

| Type of MM                           | # of MM cells injected | Time | # of mouse | Tissue examined |
|--------------------------------------|------------------------|------|------------|-----------------|
| RPMI8226<br>TRIM44 <sup>KD-CON</sup> | 10 <sup>6</sup>        | 60 h | 3          | OS / VS         |
| RPMI8226<br>TRIM44 <sup>KD</sup>     | 10 <sup>6</sup>        | 60 h | 3          | OS / VS         |
| U266<br>TRIM44 <sup>KD-CON</sup>     | 10 <sup>6</sup>        | 60 h | 3          | OS / VS         |
| U266<br>TRIM44 <sup>KD</sup>         | 10 <sup>6</sup>        | 60 h | 3          | OS / VS         |

**Table S9 for Figures 3C & D**

| Type of MM                       | # of MM cells injected | Mouse pretreated | Time | # of mouse | Tissue examined |
|----------------------------------|------------------------|------------------|------|------------|-----------------|
| U266<br>TRIM44 <sup>OE-CON</sup> | 10 <sup>6</sup>        | Vehicle          | 60 h | 3          | OS / VS         |
| U266<br>TRIM44 <sup>OE</sup>     | 10 <sup>6</sup>        | Vehicle          | 60 h | 3          | OS / VS         |
| U266<br>TRIM44 <sup>KD-CON</sup> | 10 <sup>6</sup>        | Vehicle          | 60 h | 3          | OS / VS         |
| U266<br>TRIM44 <sup>KD</sup>     | 10 <sup>6</sup>        | Vehicle          | 60 h | 3          | OS / VS         |
| U266<br>TRIM44 <sup>OE-CON</sup> | 10 <sup>6</sup>        | PTH              | 60 h | 3          | OS / VS         |
| U266<br>TRIM44 <sup>OE</sup>     | 10 <sup>6</sup>        | PTH              | 60 h | 3          | OS / VS         |
| U266<br>TRIM44 <sup>KD-CON</sup> | 10 <sup>6</sup>        | PTH              | 60 h | 3          | OS / VS         |
| U266<br>TRIM44 <sup>KD</sup>     | 10 <sup>6</sup>        | PTH              | 60 h | 3          | OS / VS         |
| RPMI<br>TRIM44 <sup>OE-CON</sup> | 10 <sup>6</sup>        | Vehicle          | 60 h | 3          | OS / VS         |
| RPMI<br>TRIM44 <sup>OE</sup>     | 10 <sup>6</sup>        | Vehicle          | 60 h | 3          | OS / VS         |
| RPMI<br>TRIM44 <sup>KD-CON</sup> | 10 <sup>6</sup>        | Vehicle          | 60 h | 3          | OS / VS         |
| RPMI<br>TRIM44 <sup>KD</sup>     | 10 <sup>6</sup>        | Vehicle          | 60 h | 3          | OS / VS         |
| RPMI<br>TRIM44 <sup>OE-CON</sup> | 10 <sup>6</sup>        | PTH              | 60 h | 3          | OS / VS         |
| RPMI<br>TRIM44 <sup>OE</sup>     | 10 <sup>6</sup>        | PTH              | 60 h | 3          | OS / VS         |
| RPMI<br>TRIM44 <sup>KD-CON</sup> | 10 <sup>6</sup>        | PTH              | 60 h | 3          | OS / VS         |
| RPMI<br>TRIM44 <sup>KD</sup>     | 10 <sup>6</sup>        | PTH              | 60 h | 3          | OS / VS         |

**Table S10 for Figure 3E**

| Type of MM                           | # of MM cells injected | Mouse pretreated | Time | # of mouse | Tissue examined |
|--------------------------------------|------------------------|------------------|------|------------|-----------------|
| RPMI8226<br>TRIM44 <sup>OE-CON</sup> | 10 <sup>6</sup>        | Vehicle          | 60 h | 3          | OS / VS         |
| RPMI8226<br>TRIM44 <sup>OE-CON</sup> | 10 <sup>6</sup>        | Vehicle          | 60 h | 3          | OS / VS         |
| RPMI8226<br>TRIM44 <sup>OE</sup>     | 10 <sup>6</sup>        | AMD3100          | 60 h | 3          | OS / VS         |
| RPMI8226<br>TRIM44 <sup>OE</sup>     | 10 <sup>6</sup>        | AMD3100          | 60 h | 3          | OS / VS         |

**Table S11 for Figure 4A**

| Type of MM                           | # of MM cells injected | # of CD34+ HSCs injected | Time | # of mouse | Tissue examined |
|--------------------------------------|------------------------|--------------------------|------|------------|-----------------|
| RPMI8226<br>TRIM44 <sup>OE-CON</sup> | 0.5x10 <sup>6</sup>    | 10 <sup>6</sup>          | 60 h | 3          | OS / VS         |
| RPMI8226<br>TRIM44 <sup>OE-CON</sup> | 10 <sup>6</sup>        | 10 <sup>6</sup>          | 60 h | 3          | OS / VS         |
| RPMI8226<br>TRIM44 <sup>OE</sup>     | 0.5x10 <sup>6</sup>    | 10 <sup>6</sup>          | 60 h | 3          | OS / VS         |
| RPMI8226<br>TRIM44 <sup>OE</sup>     | 10 <sup>6</sup>        | 10 <sup>6</sup>          | 60 h | 3          | OS / VS         |
| U266<br>TRIM44 <sup>OE-CON</sup>     | 0.5x10 <sup>6</sup>    | 10 <sup>6</sup>          | 60 h | 3          | OS / VS         |
| U266<br>TRIM44 <sup>OE-CON</sup>     | 10 <sup>6</sup>        | 10 <sup>6</sup>          | 60 h | 3          | OS / VS         |
| U266<br>TRIM44 <sup>OE</sup>         | 0.5x10 <sup>6</sup>    | 10 <sup>6</sup>          | 60 h | 3          | OS / VS         |
| U266<br>TRIM44 <sup>OE</sup>         | 10 <sup>6</sup>        | 10 <sup>6</sup>          | 60 h | 3          | OS / VS         |

**Table S12 for Figure 4C**

| Type of MM                           | # of MM cells injected | # of CD34+ HSCs injected | Time | # of mouse | Tissue examined |
|--------------------------------------|------------------------|--------------------------|------|------------|-----------------|
| RPMI8226<br>TRIM44 <sup>KD-CON</sup> | 10 <sup>6</sup>        | 10 <sup>6</sup>          | 60 h | 3          | OS / VS         |
| RPMI8226<br>TRIM44 <sup>KD</sup>     | 10 <sup>6</sup>        | 10 <sup>6</sup>          | 60 h | 3          | OS / VS         |
| U266<br>TRIM44 <sup>KD-CON</sup>     | 10 <sup>6</sup>        | 10 <sup>6</sup>          | 60 h | 3          | OS / VS         |
| U266<br>TRIM44 <sup>KD</sup>         | 10 <sup>6</sup>        | 10 <sup>6</sup>          | 60 h | 3          | OS / VS         |

**Table S13 for Figure 5A**

| Type of MM                           | # of MM cells injected | # of CD34+ HSCs injected | Time | # of mouse | Tissue examined |
|--------------------------------------|------------------------|--------------------------|------|------------|-----------------|
| -                                    | -                      | 10 <sup>6</sup>          | 16 w | 3          | OS / VS         |
| RPMI8226<br>TRIM44 <sup>OE-CON</sup> | 0.5x10 <sup>6</sup>    | 10 <sup>6</sup>          | 16 w | 3          | OS / VS         |
| RPMI8226<br>TRIM44 <sup>OE-CON</sup> | 10 <sup>6</sup>        | 10 <sup>6</sup>          | 16 w | 3          | OS / VS         |
| RPMI8226<br>TRIM44 <sup>OE-CON</sup> | 3x10 <sup>6</sup>      | 10 <sup>6</sup>          | 16 w | 3          | OS / VS         |
| RPMI8226<br>TRIM44 <sup>OE</sup>     | 0.5x10 <sup>6</sup>    | 10 <sup>6</sup>          | 16 w | 3          | OS / VS         |
| RPMI8226<br>TRIM44 <sup>OE</sup>     | 10 <sup>6</sup>        | 10 <sup>6</sup>          | 16 w | 3          | OS / VS         |
| RPMI8226<br>TRIM44 <sup>OE</sup>     | 3x10 <sup>6</sup>      | 10 <sup>6</sup>          | 16 w | 3          | OS / VS         |

**Table S14. Primer sequences for real time-PCR reactions used in the article.**

| <b>Gene</b>          | <b>Sense</b>                    | <b>Anti-sense</b>            |
|----------------------|---------------------------------|------------------------------|
| <b>Real-time PCR</b> |                                 |                              |
| TRIM44               | AGGCAGCTCATCTGTGTCCT            | TGCTCCTCATCAGCAATCAC         |
| VEGF                 | GGAGTGTGTGCCACCGAGGA<br>GTCCAAC | GGTCCCGAAACCCTGAGGGA<br>GGCT |
| GLUT1                | CTACAACACTGGAGTCATCAAT<br>GC    | GGCCAGCAGGTTTCATCAG<br>CAT   |
| MMP9                 | GAGTGGCAGGGGGAAGATGC            | CCTCAGGGCACTGCAGGATG         |
| ACTB                 | GGACTTCGAGCAAGAGATGG            | AGCACTGTGTTGGCGTACAG         |
